# Supplementary material
Source: HighWire-hosted journal article supplement (https://tobaccocontrol.bmj.com/content/tobaccocontrol-2016-053552)

**Supplementary Data**

Farley et al. (2017) Flavour Chemicals in a Sample of Non-Cigarette Tobacco Products Without Explicit Flavour Names Sold in New York City in 2015.

**Figure S1.**

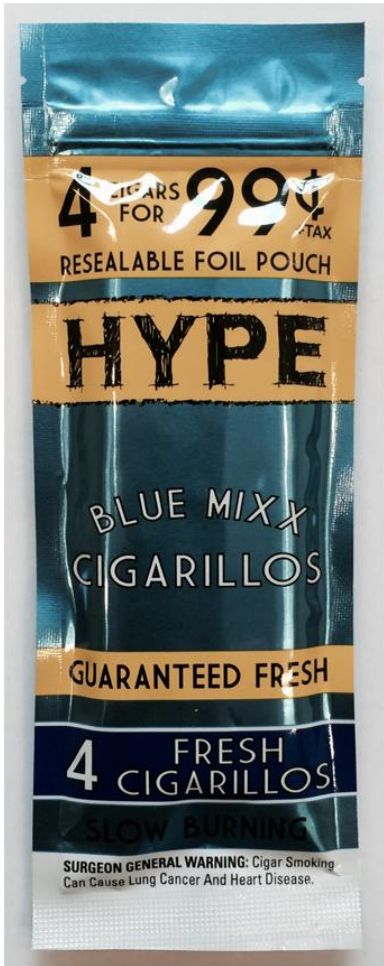

HYPE  
"Blue Mixx"  
"Cigarillos"

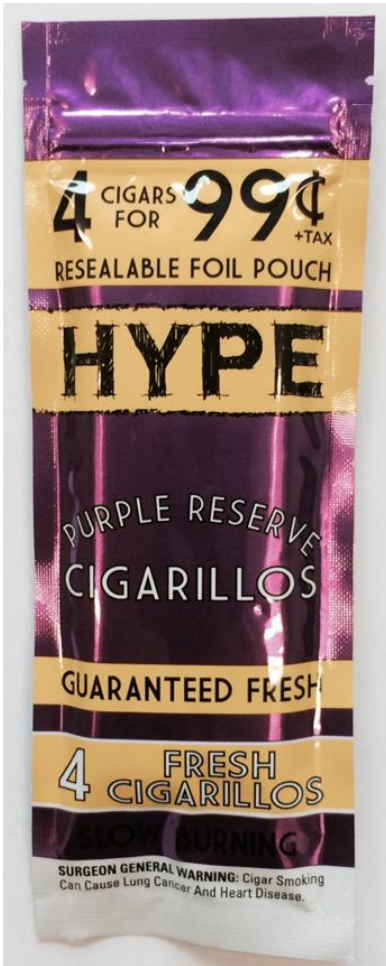

HYPE  
"Purple Reserve"  
"Cigarillos"

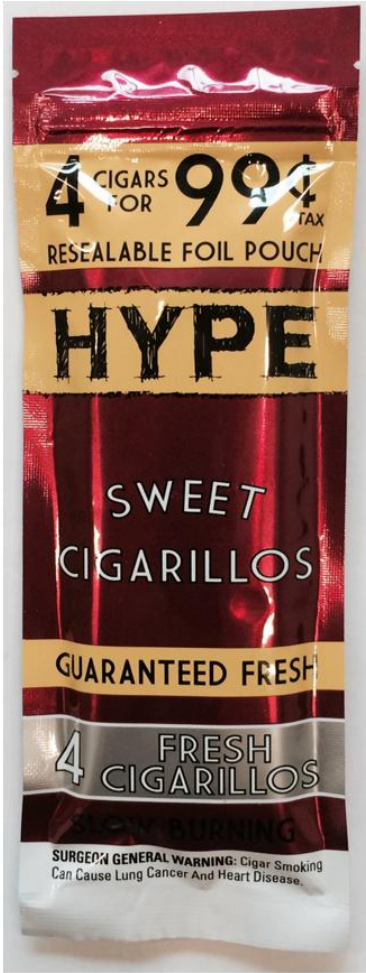

HYPE  
"Sweet"  
"Cigarillos"

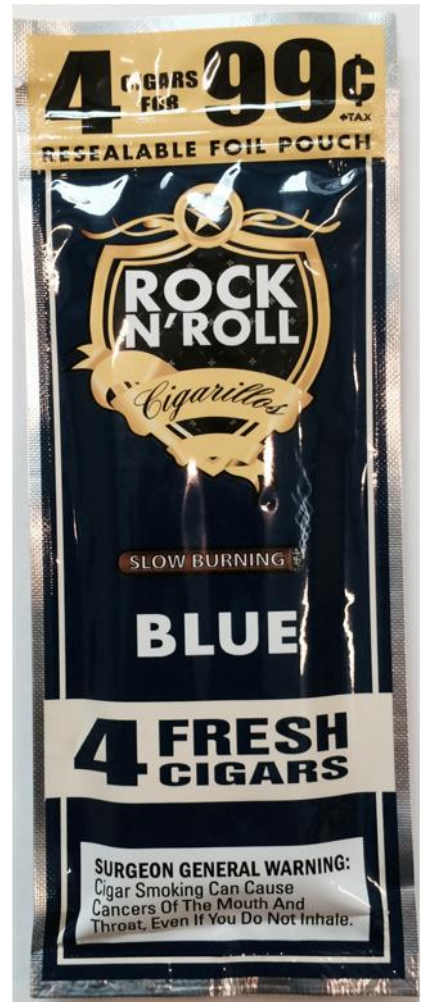

Rock N' Roll  
"Blue"  
"Cigars"

Figure S2.

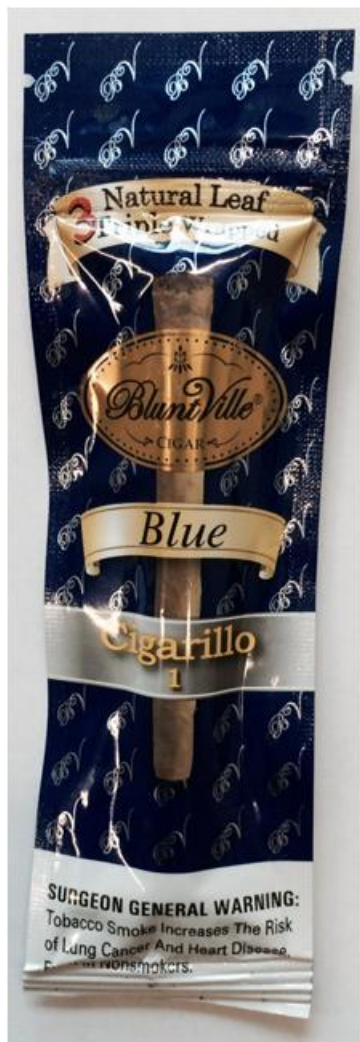

BluntVille  
"Blue"  
"Cigarillo"

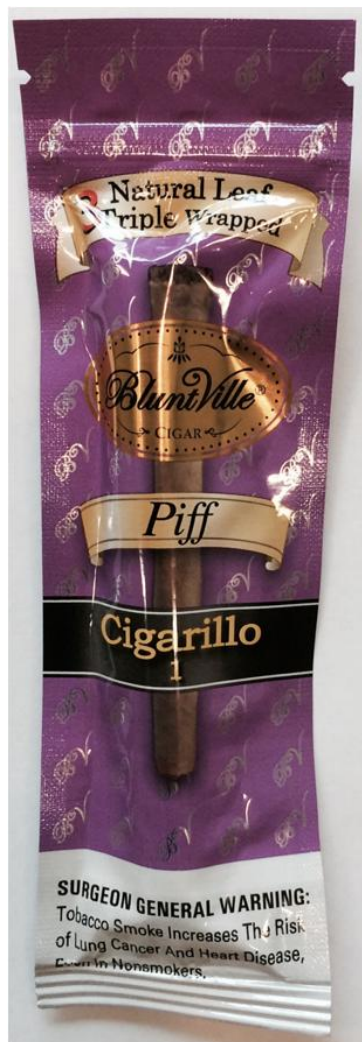

BluntVille  
"Piff"  
"Cigarillo"

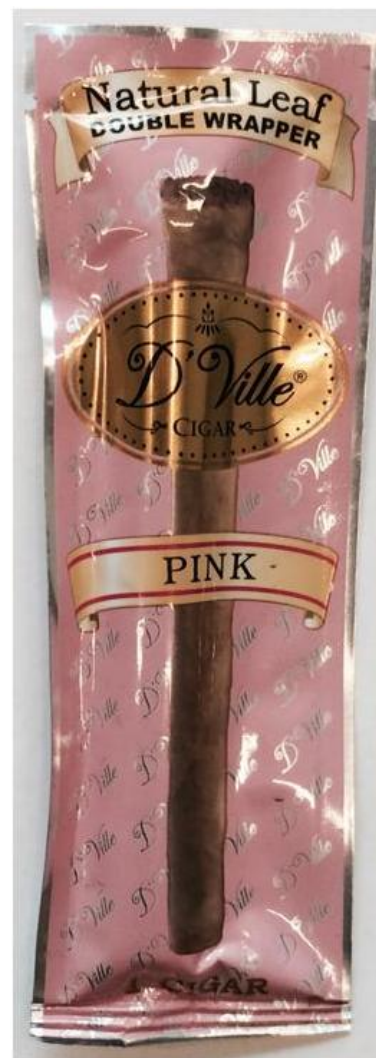

D'Ville  
"Pink"  
"Cigar"

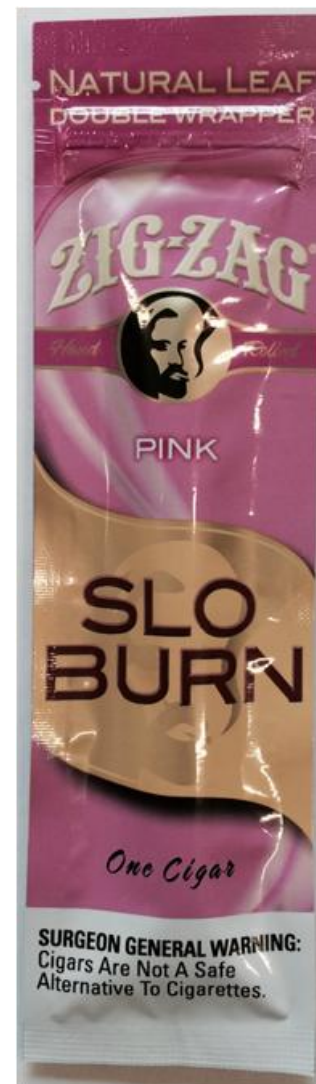

ZigZag  
"Pink"  
"Cigar"

Figure S3.

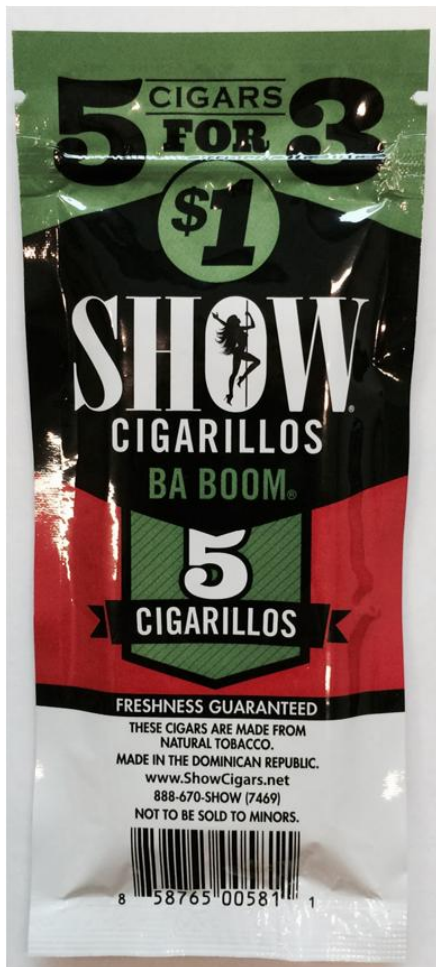

SHOW  
"Ba Boom"  
"Cigarillos"

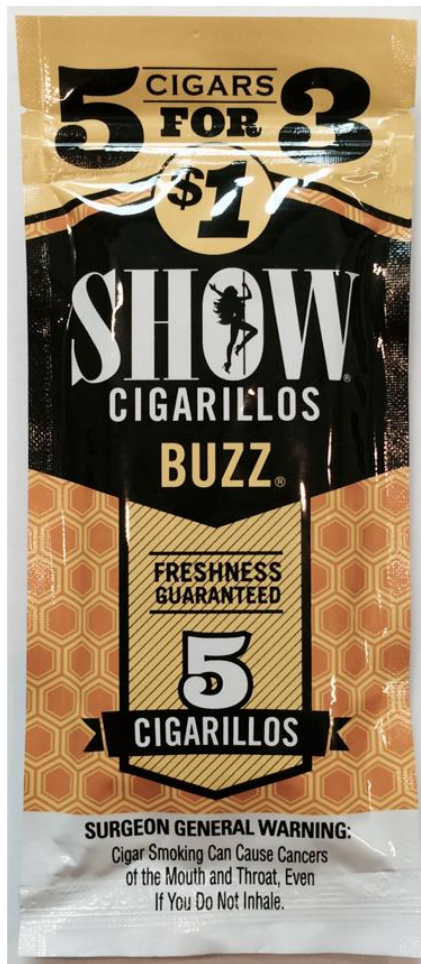

SHOW  
"Buzz"  
"Cigarillos"

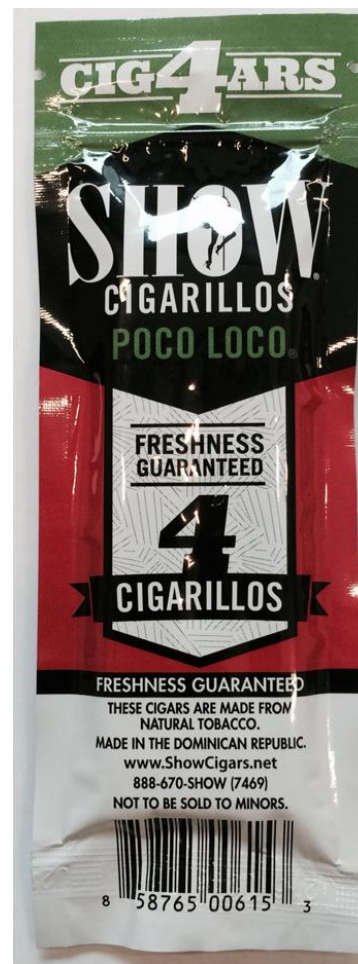

SHOW  
"Poco Loco"  
"Cigarillos"

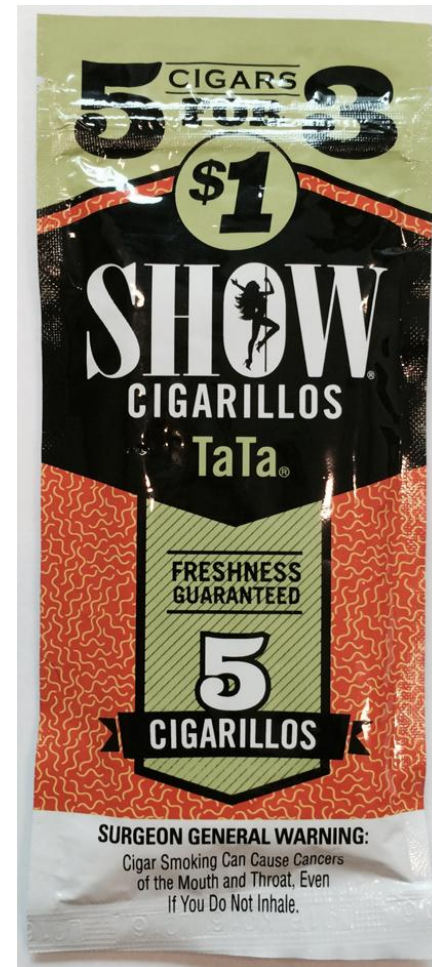

SHOW  
"TaTa"  
"Cigarillos"

Figure S4.

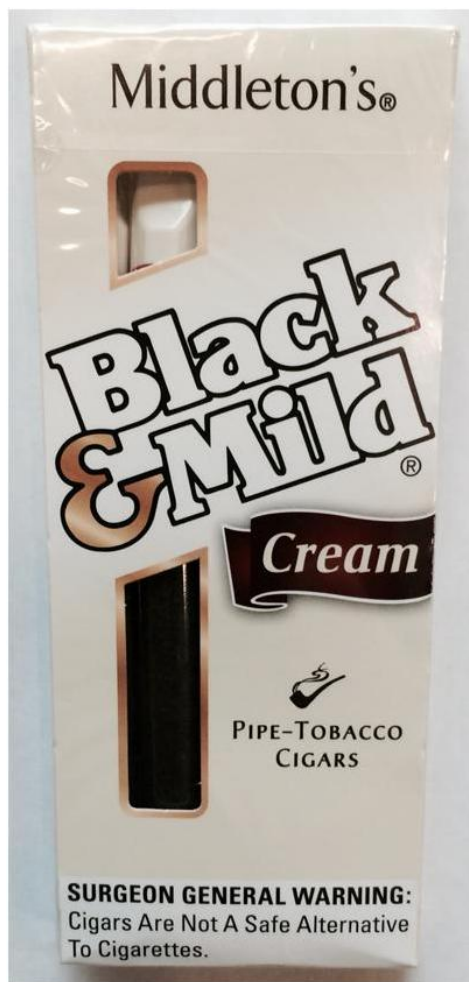

Black & Mild  
"Cream"  
"Pipe Tobacco Cigars"

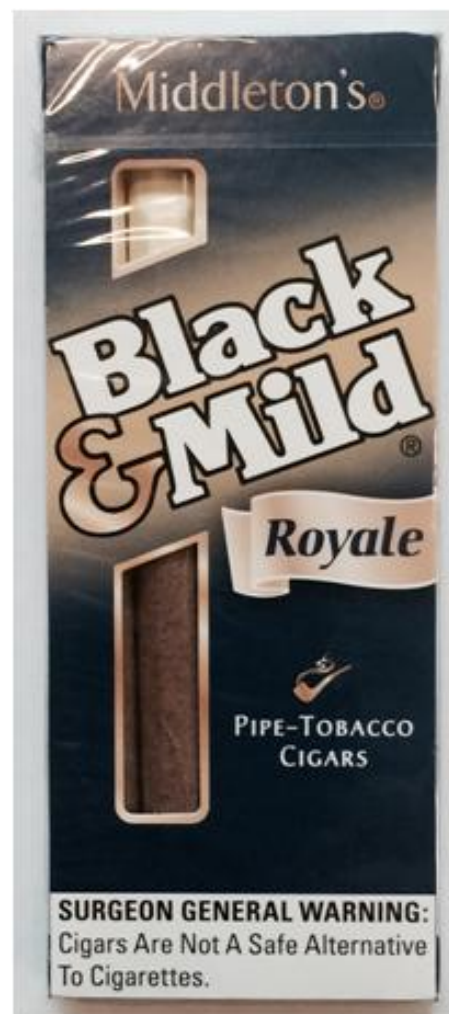

Black & Mild  
"Royale"  
"Pipe Tobacco Cigars"

Figure S5.

Camel Snus moist snuff products:

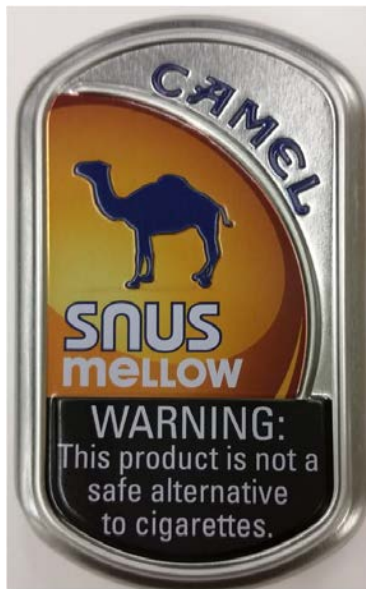

"Mellow"

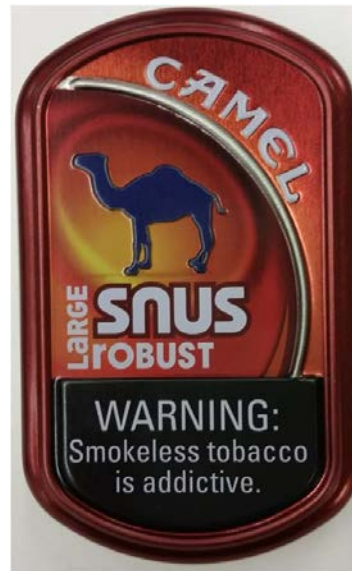

"Robust"

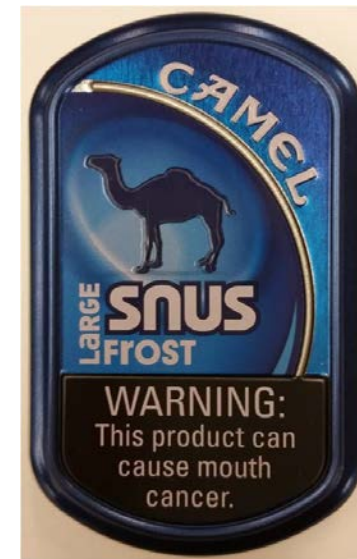

"Frost"

Skoal  
"Citrus"  
moist snuff

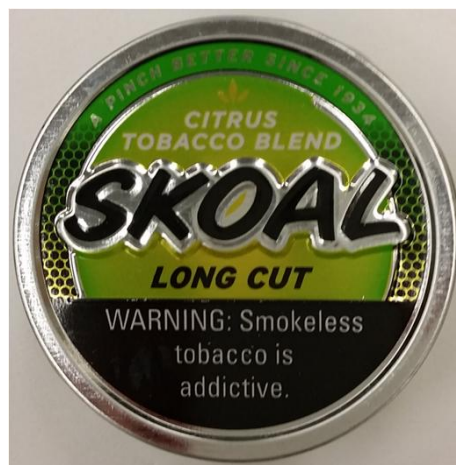

Peach  
"Sweet Snuff"  
dry snuff

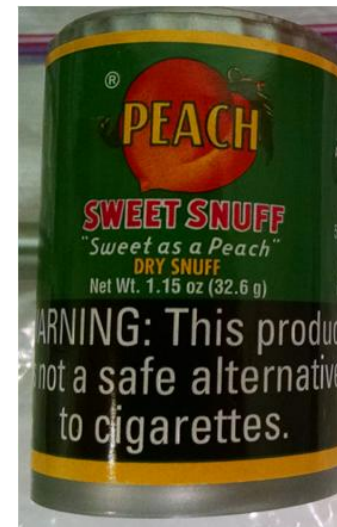

Supplement: inline-supplementary-material-1 [file inline-supplementary-material-1.pdf]
